# Supplementary material for: Enhancing the water splitting performance via decorating Co3O4 nanoarrays with ruthenium doping and phosphorization
Source: Royal Society of Chemistry journal article supplement (doi:10.1039/d0ra02128h), 2020-01-01
Supplement: d0ra02128h1.pdf [file d0ra02128h1.pdf]

Supporting Information for

**Enhancing the water splitting performance via decorating  $\text{Co}_3\text{O}_4$   
nanoarrays with ruthenium doping and phosphorization**

Jiaqi Niu,<sup>a</sup> Jian Yang,<sup>a</sup> Ali Imran Channa,<sup>b</sup> Eric Ashalley,<sup>b</sup> Jiachao Yang,<sup>a</sup> Jie Jiang,<sup>a</sup> Handong Li,<sup>a</sup> Haining Ji\*<sup>a</sup> and Xiaobin Niu\*<sup>a</sup>

<sup>a</sup> School of Materials and Energy, State Key Laboratory of Electronic Thin Film and Intergrated Devices, University of Electronic Science and Technology of China, Chengdu, 610054, PR China

E-mail: [hainingji@uestc.edu.cn](mailto:hainingji@uestc.edu.cn) E-mail: [xbniu@uestc.edu.cn](mailto:xbniu@uestc.edu.cn).

<sup>b</sup> Institute of Fundamental and Frontier Sciences, University of Electronic Science and Technology of China, Chengdu, 610054, PR China

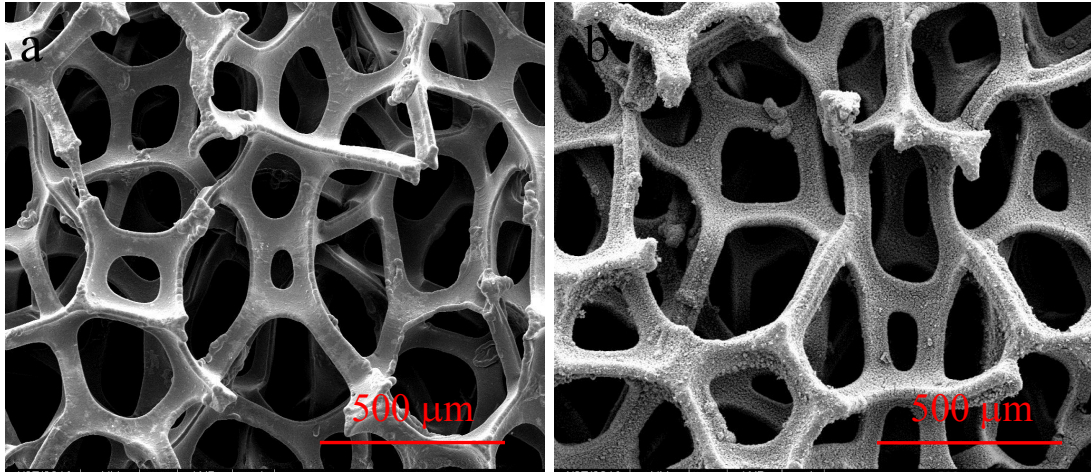

Fig. S1. SEM images of (a) pristine NF and (b)  $\text{Co}_3\text{O}_4/\text{NF}$ .

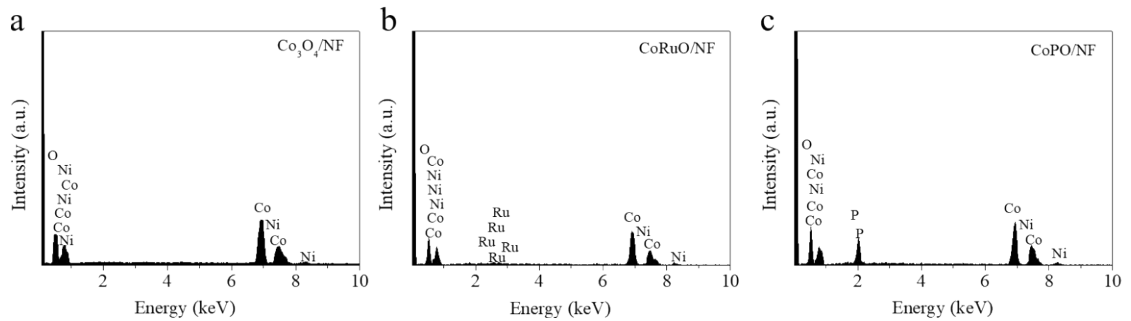

Fig. S2. EDS pattern of (a)  $\text{Co}_3\text{O}_4/\text{NF}$  catalyst, (b)  $\text{CoRuO}/\text{NF}$ , and (c)  $\text{CoPO}/\text{NF}$

Table S1. The weight percentage (wt%) of the main elements for samples.

| Samples                   | Co       | Ru      | P       |
|---------------------------|----------|---------|---------|
| $\text{CoRuO}/\text{NF}$  | 47.14wt% | 5.84wt% | 0       |
| $\text{CoPO}/\text{NF}$   | 45.82wt% | 0       | 7.94wt% |
| $\text{CoRuPO}/\text{NF}$ | 44.91wt% | 4.13wt% | 1.36wt% |

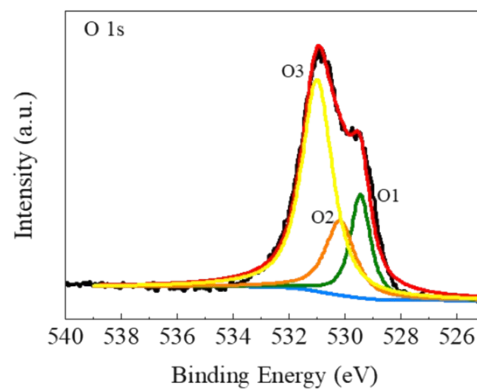

Fig. S3. High resolution of O 1s XPS peak for  $\text{CoRuPO}/\text{NF}$ .

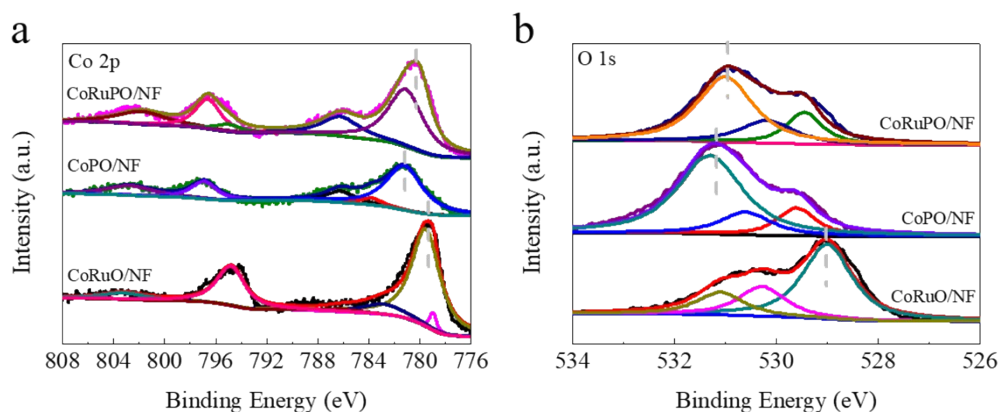

Fig. S4. XPS spectra of (a) CoRuPO/NF, CoPO/NF, and CoRuO/NF in the Co 2p regions, (b) CoRuPO/NF, CoPO/NF and CoRuO/NF in the O 1s regions.

Table S2. Comparisons of the mass activity (MA) for HER.

| Samples   | MA at 20 mV vs. RHE                   | Ref       |
|-----------|---------------------------------------|-----------|
| CoRuPO/NF | 656 mA mg <sup>-1</sup> <sub>Ru</sub> | This work |
| Pt/C/NF   | 56 mA mg <sup>-1</sup> <sub>Pt</sub>  | This work |
| Ru@MWCNT  | 186 mA mg <sup>-1</sup> <sub>Ru</sub> | 1         |
| Pt/C      | 52 mA mg <sup>-1</sup> <sub>Pt</sub>  | 1         |

Table S3. Comparisons of the mass activity (MA) for OER.

| Samples                             | MA at 250 mV vs. RHE                   | Ref       |
|-------------------------------------|----------------------------------------|-----------|
| CoRuPO/NF                           | 1192 mA mg <sup>-1</sup> <sub>Ru</sub> | This work |
| RuO <sub>2</sub> /NF                | 297 mA mg <sup>-1</sup> <sub>Ru</sub>  | This work |
| Ru <sub>1</sub> -Pt <sub>3</sub> Cu | 779 mA mg <sup>-1</sup> <sub>Ru</sub>  | 2         |
| r-RuO <sub>2</sub> Nps              | 11 mA mg <sup>-1</sup> <sub>Ru</sub>   | 3         |
| r-IrO <sub>2</sub> Nps              | 3.5 mA mg <sup>-1</sup> <sub>Ir</sub>  | 3         |

### Supplementary References

1. D. H. Kweon, M. S. Okyay, S. J. Kim, J. P. Jeon, H. J. Noh, N. Park, J. Mahmood and J. B. Baek, *Nature Communications*, 2020, **11**, 1278.
2. Y. Yao, S. Hu, W. Chen, Z. H. W. Wei, T. Yao, R. Liu, K. Zang, X. Wang, G. Wu, W. Yuan, T. Yuan, B. Zhu, W. Liu, Z. Li, D. He, Z. Xue, Y. Wang, X. Zheng, J. Dong, C. Chang, Y. Chen, X. Hong, J. Luo, S. Wei, W. Li, P. Strasser, Y. Wu and Y. Li, *Nature Catalysis*, 2019, **2**, 304-313.
3. Y. Lee, J. Suntivich, K. J. May, E. E. Perry and Y. Shaohorn, *Journal of Physical Chemistry Letters*, 2012, **3**, 399-404.
